# Supplementary material for: Cinnamaldehyde regulates mitochondrial quality against hydrogen peroxide induced apoptosis in mouse lung mesenchymal stem cells via the PINK1/Parkin signaling pathway
Source: PeerJ journal article supplement (doi:10.7717/peerj.14045), 2022-10-31
Supplement: Supplemental_File.xlsx [file Supplemental_File.xlsx]

## Sheet: Sheet1
Fig. 2A
					H2O2 (μM)	1000	800	600	400	200	0
					Repeat 1	0.285908	0.523035	0.617886	0.716802	0.848238	1
					Repeat 2	0.265432	0.416049	0.561728	0.658025	0.850617	1
					Repeat 3	0.267738	0.487282	0.62249	0.722892	1.01071	1
					Repeat 4	0.335065	0.428571	0.638961	0.693506	0.724675	1
					Repeat 5	0.324841	0.407643	0.578344	0.670064	0.802548	1
					Repeat 6	0.290068	0.348758	0.557562	0.597065	0.689616	1
					Repeat 7	0.317073	0.508344	0.614891	0.7638	0.786906	1
Fig. 2B						400	200	100	50	25	H2O2	CTRL
					Repeat 1	0.711296	0.549959	0.506398	0.484304	0.485202	0.429959	1
					Repeat 2	0.762717	0.59593	0.56651	0.52818	0.508918	0.50064	1
					Repeat 3	0.703507	0.585428	0.537987	0.524993	0.509735	0.468133	1
					Repeat 4	0.692492	0.556764	0.529183	0.485802	0.479447	0.469553	1
					Repeat 5	0.696811	0.552757	0.498337	0.487166	0.458675	0.45233	1
					Repeat 6	0.733983	0.589809	0.547281	0.524832	0.506688	0.495956	1
					Repeat 7	0.795078	0.590468	0.541822	0.533388	0.52119	0.501659	1
					Repeat 8	0.695376	0.605308	0.529259	0.507016	0.494689	0.485991	1
					Repeat 9	0.684385	0.578728	0.501035	0.489547	0.482421	0.468536	1
Fig. 2C
						CTRL	H2O2	50	200	NAC
					Repeat 1	79.179	40.868	49.035	63.998	51.264
					Repeat 2	88.972	33.701	48.771	65.507	52.586
					Repeat 3	77.91	39.769	46.468	68.246	56.762
Fig. 2D
						CTRL	H2O2	50	200	NAC
					Repeat 1	5.51	37.1	27.3	18.7	26.3
					Repeat 2	5.77	35.7	29.5	18.2	26.6
					Repeat 3	5.29	39.3	30.1	19.3	25.9
Fig. 2E
						CTRL	H2O2	50	200	NAC
					Repeat 1	3.12	28.6	19.9	6.49	10
					Repeat 2	3.47	29.9	21.6	7.31	11
					Repeat 3	3.86	29.6	18.6	6.53	10.8
Fig. 3A
						CTRL	H2O2	50	200	NAC
					Repeat 1	21.1333	3.58525	6.74419	9.95614	7.05645
					Repeat 2	21.9037	3.80193	6.57576	11.7027	7.2562
					Repeat 3	22.5708	3.69014	6.24638	12.0026	6.37037
Fig. 3B
						CTRL	H2O2	50	200	NAC
					Repeat 1	10.8661	2.3815	5.1439	8.2121	5.0249
					Repeat 2	9.7589	2.6073	4.2709	6.7023	5.2623
					Repeat 3	8.9549	2.1255	3.5337	5.7109	4.6623
Fig. 4A									FIS1				MFN1
									CTRL	H2O2	200	NAC	CTRL	H2O2	200	NAC
								Repeat 1	1	0.733	0.924	1.034	1	0.52	0.946	0.684
								Repeat 2	1	0.205	0.728	0.472	1	0.515	0.646	0.505
								Repeat 3	1	0.532	0.892	0.663	1	0.533	0.675	0.734
								Repeat 4	1	0.71	1.805	0.766	1	0.286	1.711	0.673
								Repeat 5	1	0.211	1.709	0.941	1	0.273	0.712	0.514
								Repeat 6	1	0.492	0.752	0.814	1	0.534	0.763	0.733
		MFN2				DRP1				OPA1				PGC-1α
		CTRL	H2O2	200	NAC	CTRL	H2O2	200	NAC	CTRL	H2O2	200	NAC	CTRL	H2O2	200	NAC
	Repeat 1	1	0.192	0.623	0.563	1	0.371	0.688	0.45	1	0.31	0.39	0.445	1	0.514	0.758	0.712
	Repeat 2	1	0.183	0.421	0.301	1	0.562	0.851	0.741	1	0.351	0.542	0.394	1	0.248	0.812	0.583
	Repeat 3	1	0.359	0.522	0.512	1	0.544	0.716	0.701	1	0.429	0.977	0.688	1	0.596	1.155	1.093
	Repeat 4	1	0.201	0.664	0.559	1	0.369	0.953	0.468	1	0.316	0.901	0.454	1	0.505	0.674	0.739
	Repeat 5	1	0.185	0.753	0.299	1	0.772	0.818	0.728	1	0.348	1.407	0.389	1	0.242	1.01	0.594
	Repeat 6	1	0.371	0.585	0.506	1	0.781	0.651	0.699	1	0.432	0.775	0.699	1	0.586	1.15	0.999
Fig. 4B
					CTRL	H2O2	CA	NAC
				Repeat 1	1	1.04025	1.18923	1.00373
				Repeat 2	1	1.07022	1.41332	1.26461
				Repeat 3	1	1.22953	1.19989	1.06111
Fig. 4C
					CTRL	H2O2	CA	NAC
				Repeat 1	1	1.29818	3.27053	1.71774
				Repeat 2	1	4.43379	6.92058	2.19742
				Repeat 3	1	2.12628	4.79153	2.71343
Fig. 4D
					CTRL	H2O2	CA	NAC
				Repeat 1	1	0.602628	1.85135	0.554189
				Repeat 2	1	0.634427	1.46657	0.474531
				Repeat 3	1	0.572649	1.58043	0.569242
Fig. 5A
						PINK1			Parkin
						CTRL	H2O2	CA	CTRL	H2O2	CA
					Repeat 1	1	0.155	0.515	1	0.272	0.573
					Repeat 2	1	0.456	0.62	1	0.508	0.701
					Repeat 3	1	0.077	0.698	1	0.251	0.693
Fig. 5B
						CTRL	H2O2	CA
					Repeat 1	1	1.42568	2.16717
					Repeat 2	1	1.43773	1.73638
					Repeat 3	1	1.62922	2.20547
Fig. 5C
						CTRL	H2O2	CA
					Repeat 1	1	0.872181	1.06566
					Repeat 2	1	0.865367	1.10989
					Repeat 3	1	0.906553	1.08803
