# Supplementary material for: Cinnamaldehyde regulates mitochondrial quality against hydrogen peroxide induced apoptosis in mouse lung mesenchymal stem cells via the PINK1/Parkin signaling pathway
Source: PeerJ journal article supplement (doi:10.7717/peerj.14045), 2022-10-31
Supplement: Supplemental_Information.docx [file Supplemental_Information.docx]

1. **MATERIALS & METHODS**
   1. **Animals and reagents**

Healthy male C57BL/6 mice (n = 3, weight: 18±3g, age: 5-week-old) were provided by Jiangxi University of Traditional Chinese Medicine (Jiangxi, China). CA, NAC, 3% H2O2, and dimethyl sulfoxide (DMSO) were purchased from Sigma-Aldrich (St. Louis, MO, USA). Alpha Minimum Eagle's Medium (α-MEM), fetal bovine serum (FBS), penicillin-streptomycin and 0.25% trypsin-EDTA were obtained from Gibco (Grand Island, NY, USA). Primary antibodies against coiled-coil myosin-like bcl2 interacting protein (Beclin-1), microtubule associated protein 1 light chain 3Ⅱ(LC-3Ⅱ), sequestosome-1 (P62), and parkinson disease protein (Parkin) were obtained from Cell Signaling Technology (Danvers, MA, USA). The antibody against PTEN-induced putative kinase 1 (PINK1) was obtained from Abcam (Cambridge, MA, USA). Cell Counting Kit-8 (CCK8), Total Superoxide Dismutase (SOD) Assay Kit with WST-8, Reactive Oxygen Species (ROS) Assay Kit, Annexin V-FITC Apoptosis Detection Kit, Mitochondrial Membrane Potential (MMP) Detection Kit (5,5′,6,6′-Tetrachloro-1,1′,3,3′-tetraethyl-imidacarbocyanine, JC-1), and Enhanced Adenosine Triphosphate (ATP) Assay Kit were purchased respectively from Beyotime Biotechnology Research Institute (Shanghai, China).

- 1. **Cell extraction, culture and identification**

The mice were sacrificed by cervical dislocation and immersed in 75% ethanol for 10 minutes. Then the chest cavity was opened with sterile scissors to obtain the lungs. The trachea and bronchi were removed, and lung tissue was cut into small pieces. The chopped lung tissue was then placed in α-MEM containing 0.5 mg/mL of type II collagenase (Sigma-Aldrich) and incubated at 37°C with 5% CO2 for 90 minutes. The incubated tissue was then gently ground and filtered through a 70-μm cell strainer, and the filtrate was centrifuged at 400 ×g for 15 minutes. Subsequently, the supernatant was removed, and the cell pellet was cultured in α-MEM supplemented with 10% FBS and 1% penicillin/streptomycin at 37°C with 5% CO2. The culture medium was changed every 3 days. When adherent cells reached 70%–80% confluency, they were passaged following digestion with 0.25% trypsin-EDTA. Phenotypic evaluations were performed at tenth-generation cells by FC500 flow cytometry (Beckman Coulter, Brea, CA, USA), and tenth- through fifteenth- generation cells were used for subsequent studies.

- 1. **Cell viability assay**

Murine LMSCs were plated in 96-well plates at a seeding density of 8×103 cells per well and incubated for 48 hours. The cells were then exposed to 200, 400, 600, 800, and 1000 µM H2O2 for 6 hours. After replacing the liquid in the wells with 110 µL of CCK8 working solution, the plates incubated at 37°C for 90 minutes in the dark, after which the absorbance was measured at 490 nm. Additionally, cells were plated for 24 hours and treated with media supplemented with 25, 50, 100, 200, and 400 µM CA or 5 mM NAC for another 24 hours. Subsequently, these cells were exposed to an appropriate dose of H2O2 for 6 hours, and then cell viability was measured as above.

- 1. **Total SOD assay**

Murine LMSCs were seeded in 6-well plates at a density of 2×105 cells per well and incubated for 24 hours. Additionally, cells were treated with media supplemented with 50 and 200 µM CA or 5 mM NAC for another 24 hours. Subsequently, these cells were exposed to 600 µM H2O2 for 6 hours. The measurement of SOD levels was performed using a kit from Beyotime Biotechnology (Shanghai, China) according to the manufacturer’s protocol.

- 1. **Intracellular ROS assay**

Cells in each group were inoculated into 6-well plates at a density of 2×105 cells per well. For the assay, 1 mL 2',7'-dichlorodihydrofluorescein diacetate (DCFH-DA) working solution (diluted 1000-fold in α-MEM) was added to each well and incubated with the cells in a 37℃ with 5% CO2 for 20 minutes. Extracellular DCFH-DA was removed by washing with PBS, and then the cells were collected and centrifuged at 200 ×g for 5 minutes. Finally, the cells were resuspended in 200 µL of PBS and detected by FC500 flow cytometry.

- 1. **Apoptosis assay**

Cells were plated in 6-well plates at a seeding density of 2×105 cells per well. After the corresponding treatments, the cells were collected and centrifuged at 200 ×g for 5 minutes. Next, the cells were washed three times with phosphate-buffered saline (PBS). Subsequently, the cells were resuspended in 195 µL of Annexin V-FITC binding solution, followed by adding 5 µL of Annexin V-FITC and 10 µL of propidium iodide. The cell suspensions were gently mixed and incubated at room temperature for 20 minutes in the dark. Finally, apoptotic cells were detected by FC500 flow cytometry. Percentage of apoptosis was calculated as the sum of the percentages of early and late apoptotic cells.

- 1. **Mitochondrial membrane potential**

Cells were inoculated into 6-well plates (2×105 cells per well), 1 mL of JC-1 staining solution and 1 mL of α-MEM were added to the plates and incubated at 37°C with 5% CO2 for 20 minutes. Next, the plates were centrifuged to separate the upper clear liquid, and the cells were resuspended in JC-1 staining buffer. JC-1 is an ideal fluorescent probe widely used for the detection of MMP, and it was measured by FC500 flow cytometry in this study.

- 1. **ATP assay**

The measurement of ATP levels was performed using a kit from Beyotime Biotechnology (Shanghai, China) according to the manufacturer’s protocol. After the corresponding preparation, 6-well plates were placed on ice, then the cells were washed two times with PBS. Next, 150 µL ATP lysates were added to each well, and the upper clear liquid were collected after centrifugation. The upper clear liquid was transferred into a black 96-well plate of 20 µL per well, and 100µL ATP working solution was added to each well, then ATP levels were detected using the chemiluminescence function of M1000 Pro multimode reader (Tecan, Switzerland).

- 1. **Transmission electron microscope**

The cells were washed twice with α-MEM, gently scraped and put into the tubes, and then centrifuged at 200 ×g for 5 minutes. The supernatant was discarded and the cells was done with electron microscope fixing solution (2.5% glutaraldehyde) overnight at 4℃. Next day, the samples were washed twice with PBS and fixed in 1% osmium tetroxide for 20 minutes, then washed twice with PBS again. The samples were dehydrated with increasing concentrations of acetone solution (50%, once, 10 minutes; and 70%, once, 10 minutes; and 90%, twice, 10 minutes; 100%, three times, 10 minutes). Soaked the dehydrated samples in the embedding suspension overnight. Ultrathin sections were prepared and observed by JEM-1230 transmission electron microscope (JEOL, Japan).

- 1. **PCR analysis**

RNA isolation was performed using TRIzol reagent from Thermo Fisher Scientific (Waltham, MA, USA). Total cDNA was synthesized by the Transcriptor First Strand cDNA Synthesis Kit from Roche (Basel, Switzerland). All PCR reactions were set in duplicates using the SYBR Green Master from Roche. Amplifications, detections, and analyses were performed in a QuantStudioTM Real-time PCR Software. The delta CT method was used for normalization.

- 1. **Western blotting**

Cells were incubated in radio-immunoprecipitation assay (RIPA) buﬀer on ice, then centrifuged at 21000 ×g for 30 minutes at 4°C. The protein concentration of lysates was measured using the Protein Concentration Assay kit (LIANKE Biotech, Co. Ltd, Hangzhou, China). The lysates were then separated by SDS-PAGE and transferred to polyvinylidene fluoride (PVDF) membranes. Membranes were blocked with western blocking buffer (Beyotime Biotechnology, Shanghai, China) for 90 minutes at room temperature. After incubation with primary antibodies overnight at 4°C, and then secondary antibodies for 1 hour at room temperature, immunoreactive bands were detected by chemiluminescence, and the grey values were analyzed with IMAGE J software.

1. **RESULTS**
   1. **Morphological characteristics of murine LMSCs**

The first generation murine LMSCs extracted were indistinct and mixed with a few epithelioid cells. And the fourth generation murine LMSCs were still not dominant, but other cells begun to weaken. When these cells were passaged to the seventh generation, most of the others have died. Until the tenth generation, the cells presented as typical fusiform-type of murine LMSCs.

- 1. **Cell viability**

Compared with the control group, the survival of murine LMSCs was gradually reduced as the H2O2 dose increased, becoming 59.88% at 600 µM H2O2, which was selected as the appropriate dose for modelling (Mean Diff. 0.4012, SE of Diff. 0.03052, 95% CI of Diff. 0.3208 to 0.4815, n=7, *P*<0.0001). Moreover, the survival rate of cells increased greatly after pre-treatment with CA. The H2O2 group showed decreased viability compared with control cells (Mean Diff. -0.5252, SE of Diff. 0.01087, 95% CI of Diff. -0.5540 to -0.4965, n=9, *P*<0.0001), and compared with H2O2-treated cells, the cell viability of 400, 200, 100, and 50 µM CA groups significantly increased (Mean Diff. -0.2448, 95% CI of Diff. -0.2735 to -0.2160, n=9, *P*<0. 0001; Mean Diff. -0.1036, 95% CI of Diff. -0.1324 to -0.07483, n=9, *P*<0. 0001; Mean Diff. -0.05390, 95% CI of Diff. -0.08266 to -0.02513, n=9, *P*<0.0001; Mean Diff. -0.03250, 95% CI of Diff. -0.06126 to -0.003729, n=9, *P*=0.0208); however, there was no significant difference between the 25 µM CA group and the H2O2 group (Mean Diff. -0.01936, 95% CI of Diff. -0.04812 to 0.009411, n=9, *P*=0.3050).

- 1. **SOD**

The SOD level of the H2O2 group was 38.11±3.86, the NAC group was 53.54±2.87, and the 50 and 200 µM CA groups were 48.09±1.41 and 65.92±2.15. The H2O2 group was lower than the control group (82.02±6.05; Mean Diff. 43.91, SE of Diff. 2.976, 95% CI of Diff. 34.11 to 53.70, n=3, *P*<0.0001). Furthermore, the 50, 200 µM CA and NAC groups were significantly different than the H2O2 group (Mean Diff. -9.979, 95% CI of Diff. -19.77 to -0.1852, n=3, *P*=0.0454; Mean Diff. -27.80, 95% CI of Diff. -37.60 to -18.01, n=3, *P*<0.0001; Mean Diff. -15.42, 95% CI of Diff. -25.22 to -5.631, n=3, *P*=0.0029); CA improved SOD levels in a dose-dependent manner, and 200 µM CA was higher than NAC (Mean Diff. 12.38, 95% CI of Diff. 2.586 to 22.17, n=3, *P=*0.0131); however, there was no significant difference between the 50 µM CA group and the NAC group (Mean Diff. -5.446, 95% CI of Diff. -15.24 to 4.347, n=3, *P=*0.4091).

- 1. **ROS**

The level of intracellular ROS was 37.37%±1.82% in the H2O2 group, which was signiﬁcantly increased compared with the level of the control group (5.52%±0.24%; Mean Diff. -31.84, SE of Diff. 0.8908, 95% CI of Diff. -34.77 to -28.91, n=3, *P*<0.0001). The ROS levels were 26.27%±0.35% in the NAC group, and 28.97%±1.47% and 18.73%±0.55% in the 50 and 200 µM CA groups, respectively, which were all sharply decreased than those in the H2O2 one (Mean Diff. 11.10, 95% CI of Diff. 8.168 to 14.03, n=3, *P*<0.0001; Mean Diff. 8.400, 95% CI of Diff. 5.468 to 11.33, n=3, *P*<0.0001; Mean Diff. 18.63, 95% CI of Diff. 15.70 to 21.56, n=3, *P*<0.0001); the level of 200 µM CA group was higher than that of NAC (Mean Diff. -7.533, 95% CI of Diff. -10.46 to -4.602, n=3, *P*<0.0001), but there was no significant difference between the 50 µM CA group and the NAC one(Mean Diff. 2.700, 95% CI of Diff. -0.2316 to 5.632, n=3, *P*=0.0748).

- 1. **Apoptosis rates**

The apoptosis rates were 29.37%±0.68% in the H2O2 group, 10.60%±0.53% in the NAC group, and 20.03%±1.50% and 6.78%±0.46% in the 50 and 200 µM CA groups. The H2O2 group was higher than the control group (3.48%±0.37%; Mean Diff. 25.88, SE of Diff. 0.6691, 95% CI of Diff. 23.95 to 27.82, n=3, *P*<0.0001). Moreover, the 50, 200 µM CA and NAC groups were significantly lower than the H2O2 group (Mean Diff. 9.333, 95% CI of Diff. 7.131 to 11.54, n=3, *P*<0.0001; Mean Diff. 22.59, 95% CI of Diff. 20.39 to 24.79, n=3, *P*<0.0001; Mean Diff. 18.77, 95% CI of Diff. 16.56 to 20.97, n=3, *P*<0.0001); CA improved apoptosis rates in a dose-dependent way, and the 200 µM CA rate was lower than the NAC one(Mean Diff. 3.823, 95% CI of Diff. 1.621 to 6.025, n=3, *P=*0.0014).

- 1. **MMP**

The MMP level was 3.69±0.11 in the H2O2 group, which was signiﬁcantly decreased compared with the level of the control group (21.87±0.72; Mean Diff. 18.18, SE of Diff. 0.5203, 95% CI of Diff. 16.46 to 19.89, n=3, *P*<0.0001). The MMP levels were 6.89±0.46 in the NAC group, and 6.52±0.25 and 11.22±1.11 in the 50 and 200 µM CA groups, respectively, which were all significantly higher than that of the H2O2 one (Mean Diff. -3.202, 95% CI of Diff. -4.914 to -1.489, n=3, *P=*0.0008; Mean Diff. -2.830, 95% CI of Diff. -4.542 to -1.117, n=3, *P=*0.0021; Mean Diff. -7.528, 95% CI of Diff. -9.240 to -5.816, n=3, *P*<0.0001); the level of 200 µM CA group was higher than that of NAC (Mean Diff. 4.326, 95% CI of Diff. 2.614 to 6.039, n=3, *P*<0.0001), but there was no significant difference between the 50 µM CA group and the NAC one(Mean Diff. -0.3722, 95% CI of Diff. -2.085 to 1.340, n=3,*P=*0.9482).

- 1. **ATP**

The ATP results were 2.37±0.24 in the H2O2 group, 4.98±0.30 in the NAC group, and 4.32±0.81 and 6.88±1.28 in the 50 and 200 µM CA groups. The H2O2 group was lower than the control group (9.86±0.96; Mean Diff. 7.489, SE of Diff. 0.6640, 95% CI of Diff. 5.303 to 9.674, n=3, *P*<0.0001). Moreover, the 200 µM CA and NAC groups were significantly higher than the H2O2 group (Mean Diff. -4.504, 95% CI of Diff. -6.689 to -2.319, n=3, *P*=0.0004; Mean Diff. -2.612, 95% CI of Diff. -4.797 to -0.4266, n=3, *P=*0.0185). But there is no obvious difference between the 50 µM CA group and the H2O2 one (Mean Diff. -1.945, 95% CI of Diff. -4.130 to 0.2404, n=3, *P=*0.0875).

- 1. **mRNA levels of mitochondrial dynamics**

Compared with the control groups, the mRNA levels of FIS1, MFN1, MFN2, DRP1, OPA1, and PGC-1α were decreased in the H2O2 groups (Mean Diff. 0.5195, SE of Diff. 0.1665, 95% CI of Diff. 0.05362 to 0.9854, n=6, *P=*0.0255; Mean Diff. 0.5565, SE of Diff. 0.1268, 95% CI of Diff. 0.2017 to 0.9113, n=6, *P=*0.0015; Mean Diff. 0.7515, SE of Diff. 0.05531, 95% CI of Diff. 0.5967 to 0.9063, n=6, *P*<0.0001; Mean Diff. 0.4335, SE of Diff. 0.07325, 95% CI of Diff. 0.2285 to 0.6385, n=6, *P*<0.0001; Mean Diff. 0.6357, SE of Diff. 0.1123, 95% CI of Diff. 0.3214 to 0.9499, n=6, *P*<0.0001; Mean Diff. 0.5515, SE of Diff. 0.09753, 95% CI of Diff. 0.2785 to 0.8245, n=6, *P*<0.0001). However, all the levels in the 200 µM CA groups were obviously increased than those in H2O2 groups (Mean Diff. -0.6545, 95% CI of Diff. -1.120 to -0.1886, n=6, *P*=0.0042; Mean Diff. -0.4653, 95% CI of Diff. -0.8202 to -0.1105, n=6, *P*=0.0076; Mean Diff. -0.3462, 95% CI of Diff. -0.5010 to -0.1914, n=6, *P*<0.0001; Mean Diff. -0.2130, 95% CI of Diff. -0.4180 to -0.007966, n=6, *P*=0.0400; Mean Diff. -0.4677, 95% CI of Diff. -0.7819 to -0.1534, n=6, *P*=0.0025; Mean Diff. -0.4780, 95% CI of Diff. -0.7510 to -0.2050, n=6, *P*=0.0005). But the mRNA levels of FIS1, MFN1, DRP1, and OPA1 had no significant difference between NAC and H2O2 groups (Mean Diff. -0.3012, 95% CI of Diff. -0.7671 to 0.1647, n=6, *P*=0.2982; Mean Diff. -0.1970, 95% CI of Diff. -0.5518 to 0.1578, n=6, *P*=0.4259; Mean Diff. -0.06467, 95% CI of Diff. -0.2697 to 0.1404, n=6, *P*=0.8137; Mean Diff. -0.1472, 95% CI of Diff. -0.4614 to 0.1671, n=6, *P*=0.5671).

- 1. **Expression levels of autophagy-related proteins**

The expressions of Beclin-1 in all groups had no statistical difference (CTRL vs. H2O2: Mean Diff. -0.1133, SE of Diff. 0.08672, 95% CI of Diff. -0.3910 to 0.1644, n=3, *P*=0.5839; CTRL vs. CA: Mean Diff. -0.2675, 95% CI of Diff. -0.5452 to 0.01023, n=3, *P*=0.0590; CTRL vs. NAC: Mean Diff. -0.1098, 95% CI of Diff. -0.3875 to 0.1679, n=3, *P*=0.6065). Moreover, the levels of LC3-Ⅱ in H2O2 and NAC groups were no obvious difference compared with the level of control group (Mean Diff. -1.619, SE of Diff. 1.021, 95% CI of Diff. -4.888 to 1.649, n=3, *P*=0.4364; Mean Diff. -1.210, 95% CI of Diff. -4.478 to 2.059, n=3, *P*=0.6520). But the level in the 200 µM CA group was markedly higher than that in the control one (Mean Diff. -3.994, 95% CI of Diff. -7.263 to -0.7259, n=3, *P*=0.0187). The P62 level of H2O2 group was lower than that of control group (Mean Diff. 0.3968, SE of Diff. 0.08428, 95% CI of Diff. 0.1269 to 0.6666, n=3, *P*=0.0066). There was no significant difference between NAC and H2O2 groups (Mean Diff. 0.07058, 95% CI of Diff. -0.1993 to 0.3405, n=3, *P=*0.8355), yet the 200 µM CA one was sharply raised (Mean Diff. -1.030, 95% CI of Diff. -1.299 to -0.7597, n=3, *P*<0.0001).

- 1. **Expression levels of PINK1/Parkin proteins**

Compared with the control groups, the mRNA levels of PINK1 and Parkin were decreased in the H2O2 groups (Mean Diff. 0.7707, SE of Diff. 0.1038, 95% CI of Diff. 0.4522 to 1.089, n=3, *P*=0.0008; Mean Diff. 0.6563, SE of Diff. 0.07529, 95% CI of Diff. 0.4253 to 0.8873, n=3, *P*=0.0003). However, all the mRNA levels in the 200 µM CA groups were obviously increased (Mean Diff. -0.3817, 95% CI of Diff. -0.7002 to -0.06317, n=3, *P*=0.0242; Mean Diff. -0.3120, 95% CI of Diff. -0.5430 to -0.08100, n=3, *P*=0.0143). The protein expression level of PINK1 in the H2O2 group was higher than the level in the control group (Mean Diff. -0.4975, SE of Diff. 0.1341, 95% CI of Diff. -0.9089 to -0.08617, n=3, *P*=0.0232), and the level in the 200 µM CA group was higher than the figure for the H2O2 one (Mean Diff. -0.5388, 95% CI of Diff. -0.9502 to -0.1274, n=3, *P*=0.0164). Moreover, the protein expression level of Parkin in H2O2 group was lower than the level in the control group (Mean Diff. 0.1186, SE of Diff. 0.01473, 95% CI of Diff. 0.07344 to 0.1638, n=3, *P*=0.0005), and the level in the 200 µM CA group was higher than that in the H2O2 one (Mean Diff. -0.2065, 95% CI of Diff. -0.2517 to -0.1613, n=3, *P*<0.0001).
